# Supplementary material for: Parameters affecting the synthesis of carbon dots for quantitation of copper ions
Source: PubMed Central journal article supplement — Nanoscale Adv. 2019 May 14;1(7):2553–61. doi: 10.1039/c9na00137a (PMC9419006; doi:10.1039/c9na00137a), 2019-05-14
Supplement: NA-001-C9NA00137A-s001.pdf [file NA-001-C9NA00137A-s001.pdf]

## Supporting Information

### Parameters Affecting Synthesis of Carbon Dots for Quantitation of Copper Ions

*Yu-Syuan Lin,<sup>†,+</sup> Yaling Lin,<sup>†,+</sup> Arun Prakash Periasamy,<sup>†</sup> Jinshun Cang<sup>‡</sup> and Huan-Tsung Chang<sup>\*,†,§</sup>*

<sup>†</sup>Department of Chemistry, National Taiwan University, Taipei 10617, Taiwan

<sup>‡</sup> Department of Chemical Engineering, Yancheng Institute of Industry Technology, Yancheng, Jiangsu 224005, China

<sup>§</sup>Department of Chemistry, Chung Yuan Christian University, Taoyuan City 32023, Taiwan

<sup>+</sup>These authors contributed equally to this work

**Corresponding Author:** Professor Huan-Tsung Chang, Department of Chemistry, National Taiwan University, 1, Section 4, Roosevelt Road, Taipei 10617, Taiwan. Tel and fax: 011-886-2-33661171. E-mail: changht@ntu.edu.tw

**Table of Contents**

**Page No.**

|                                                                                                                       |      |
|-----------------------------------------------------------------------------------------------------------------------|------|
| Table S1 Elemental compositions (%) of four types of C dots before and after reaction with Cu <sup>2+</sup> ions.     | S-3  |
| Table S2. Quantitation of Cu <sup>2+</sup> ions using different nanomaterial probes.                                  | S-4  |
| Fig. S1 TEM and HRTEM images of C dots                                                                                | S-5  |
| Fig. S2 FTIR spectra of C dots                                                                                        | S-6  |
| Fig. S3 XPS spectra of C dots                                                                                         | S-7  |
| Fig. S4 Raman spectra of C dots                                                                                       | S-8  |
| Fig. S5 pH stability and salt tolerance of C dots                                                                     | S-9  |
| Fig. S6 Selectivity of C dots toward the detection of Cu <sup>2+</sup> ions                                           | S-10 |
| Fig. S7 CV curves and EIS spectra of bare GCE recorded in phosphate buffer (20 mM, pH 3.0) under different conditions | S-11 |
| Fig. S8 Real sample analysis                                                                                          | S-12 |
| References                                                                                                            | S-13 |

**Table S1.** Elemental compositions (%) of four types of C dots before and after reaction with  $\text{Cu}^{2+}$  ions.

| Elements | C dots         | Cl-C dots | Br-C dots | I-C dots | I-C dots + $\text{Cu}^{2+}$ |
|----------|----------------|-----------|-----------|----------|-----------------------------|
| C        | 68.79          | 66.40     | 57.00     | 59.70    | 44.84                       |
| N        | 14.52          | 15.35     | 17.73     | 15.30    | 6.50                        |
| O        | 16.33          | 17.61     | 23.96     | 23.33    | 47.15                       |
| I        | - <sup>a</sup> | -         | -         | 1.46     | 0.55                        |
| Br       | -              | -         | 0.95      | -        | -                           |
| Cl       | 0.37           | 0.64      | 0.23      | 0.21     | 0.22                        |

<sup>a</sup> not detected

**Table S2.** Quantitation of Cu<sup>2+</sup> ions using different nanomaterial probes.

| Probe                    | Linear range ( $\mu\text{M}$ ) | LOD ( $\mu\text{M}$ ) | Ref.       |
|--------------------------|--------------------------------|-----------------------|------------|
| <sup>a</sup> CdSe@C-TPEA | 1-100                          | 1                     | 1          |
| <sup>b</sup> ZnS QDs     | 26-260                         | 7.1                   | 2          |
| <sup>c</sup> Probe L     | 4-12                           | 1.8                   | 3          |
| <sup>d</sup> B, N-C dots | 1-25                           | 0.3                   | 4          |
| Cys-CdS QDs              | 2-10                           | 1.5                   | 5          |
| C dots                   | 5.16-20                        | 1.72                  | 6          |
| Petroleum coke C dots    | 0.25-10                        | 0.029                 | 7          |
| N-C dots                 | 0.6-30                         | 0.19                  | 8          |
| I-C dots                 | 0.3-3                          | 0.22                  | This study |

<sup>a</sup>TPEA: N-(2-aminoethyl)-N,N,N'-tris(pyridin-2-ylmethyl)ethane-1,2-diamine.

<sup>b</sup>QDs: quantum dots.

<sup>c</sup>Probe L prepared from 4-bromo-1,8 naphthalene anhydride and 2-thiophene formaldehyde.

<sup>d</sup>B, N-C dots prepared from aminophenylboronic acid

<sup>e</sup>CQD: carbon quant

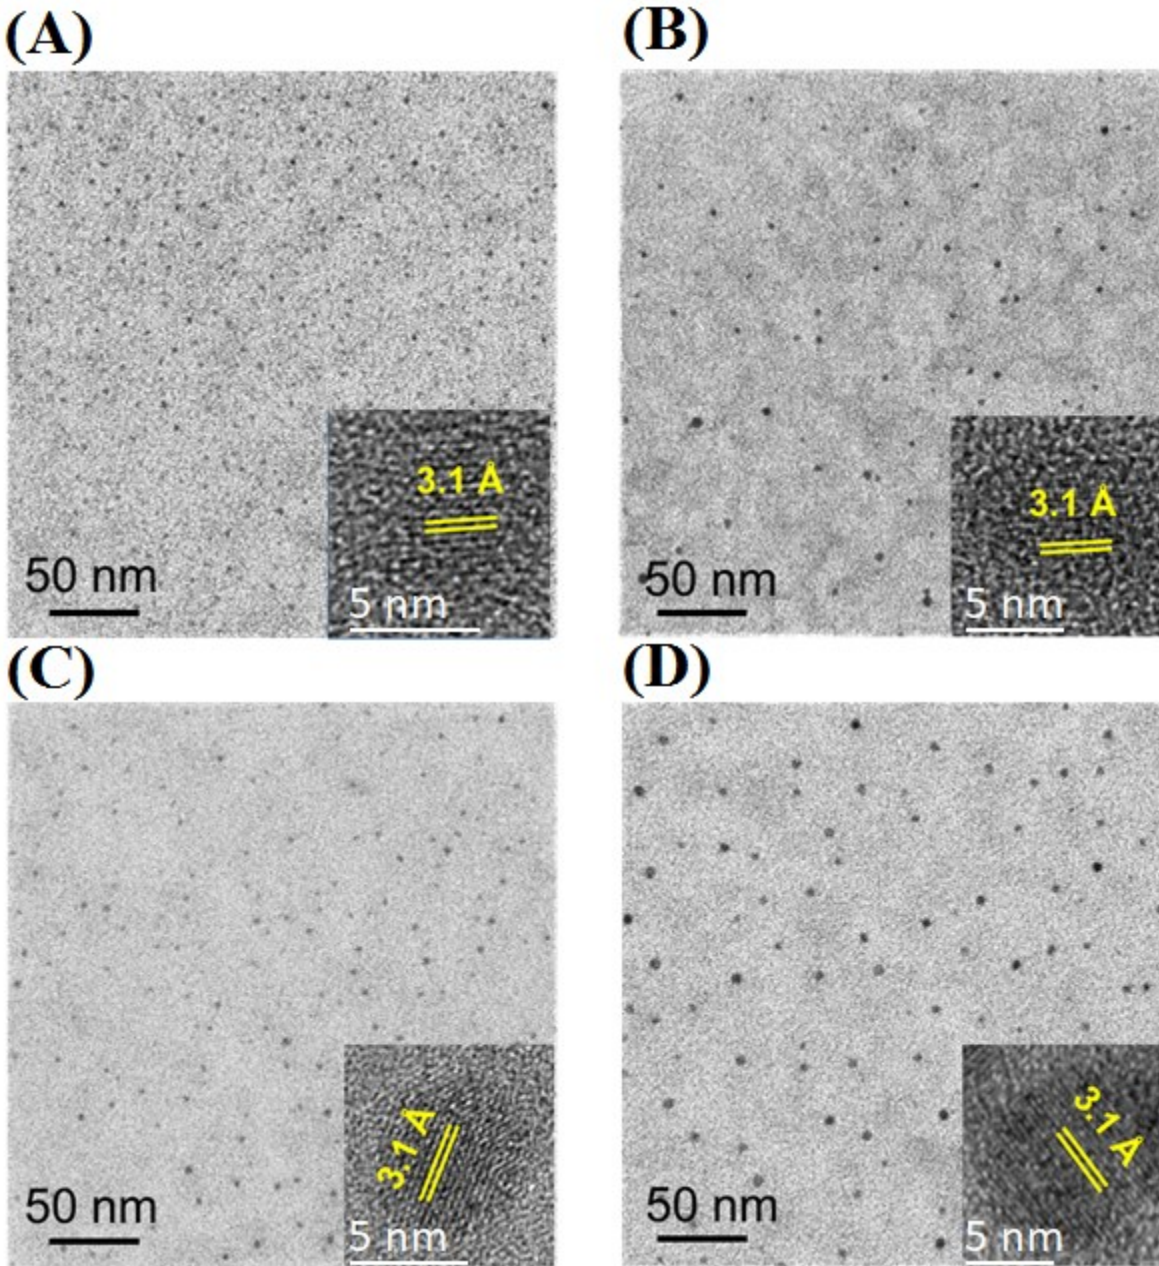

**Fig. S1.** TEM images of (A) C dots, (B) Cl-C dots, (C) Br-C dots, and (D) I-C dots. Insets: HRTEM images of the corresponding C dots.

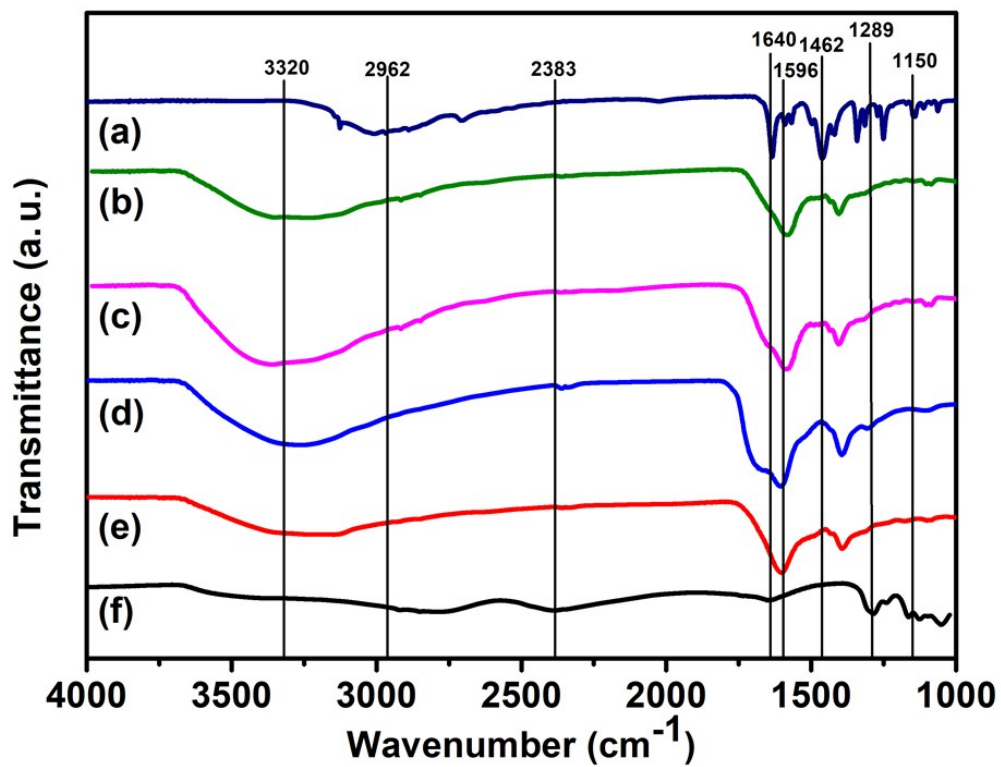

**Fig. S2.** FTIR spectra of (a) histidine, (b) C dots, (c) Cl-C dots, (d) Br-C dots, (e) I-C dots, and (f) I-C dots after reaction with 100 μM Cu<sup>2+</sup> ions.

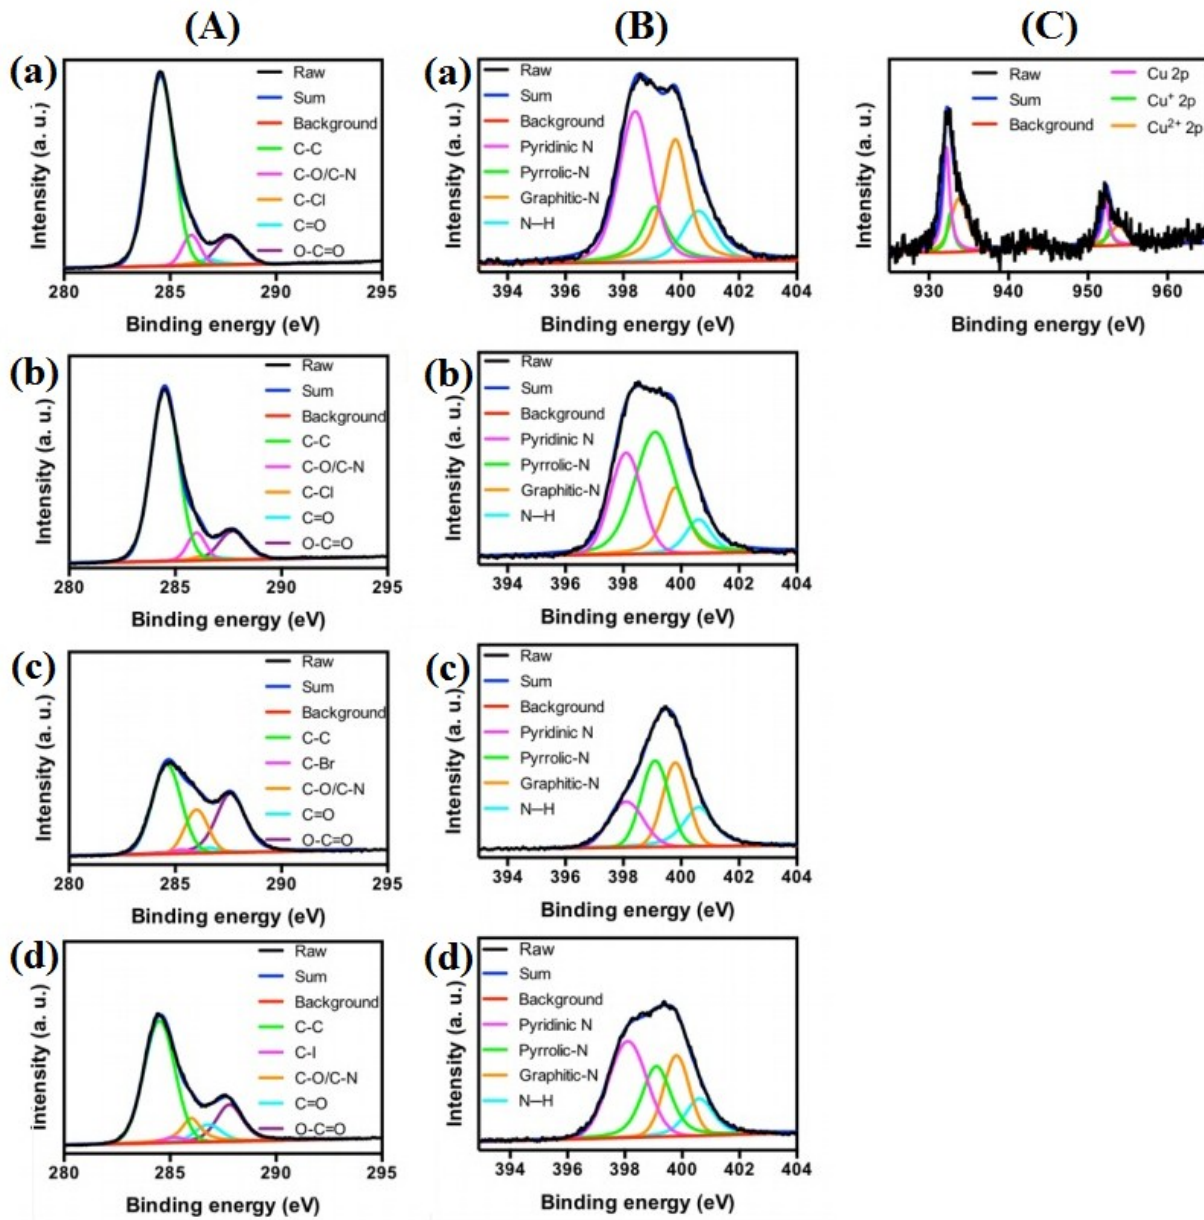

**Fig. S3.** Deconvoluted (A) C1s and (B) N1s core level XPS spectra of (a) C dots, (b) Cl-C dots, (c) Br-C dots, and (d) I-C dots. (C) Deconvoluted Cu<sub>2p3/2</sub> core level spectra of I-C dots after reaction with 100  $\mu$ M Cu<sup>2+</sup> ions.

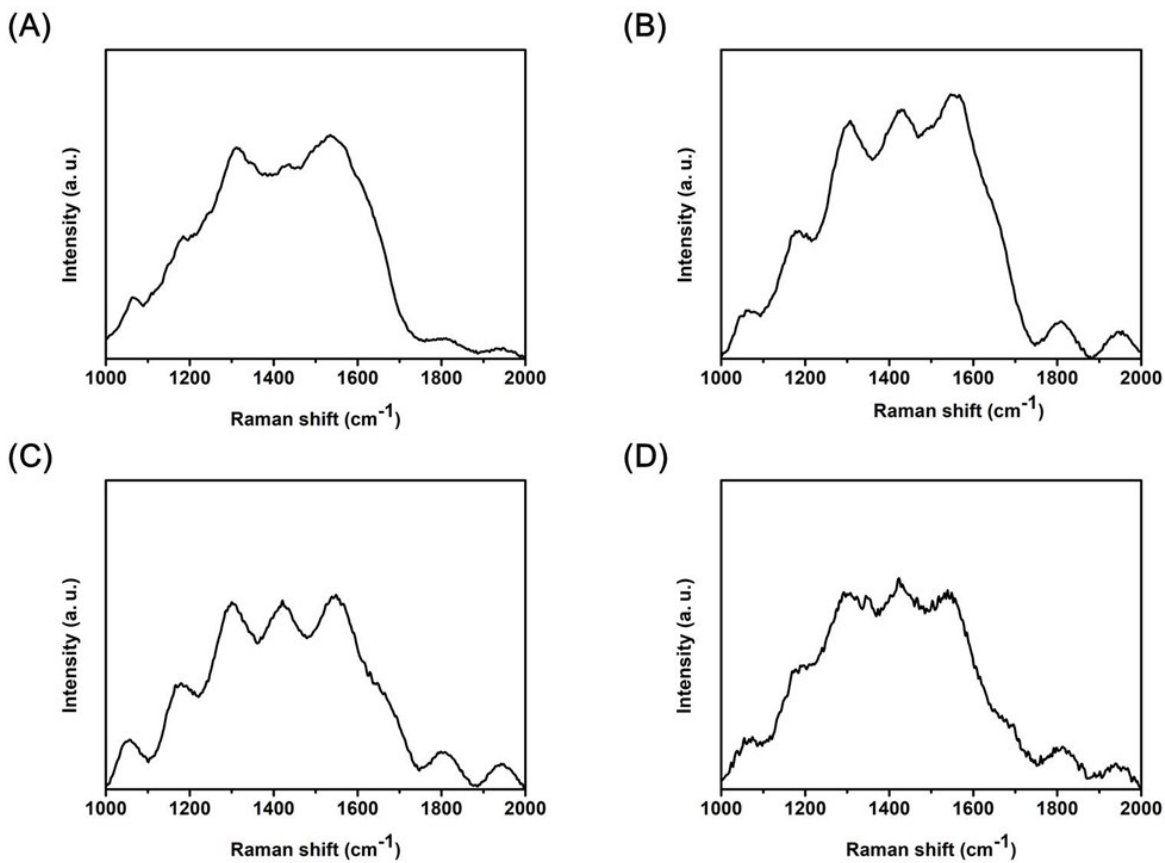

**Fig. S4.** Raman spectra of (A) C dots, (B) Cl-C dots, (C) Br-C dots, and (D) I-C dots.



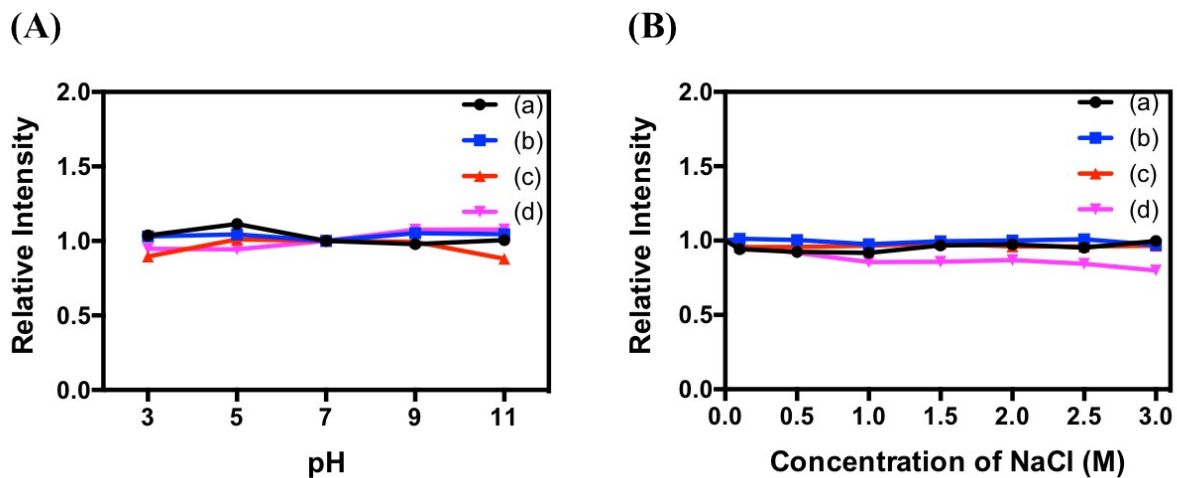

**Fig. S5.** Effects of (A) pH (3.0–11.0) and (B) NaCl concentration (0–3.0 M) on the stability of (a) C dots, (b) Cl-C dots, (c) Br-C dots, and (d) I-C dots. C dots: 0.01X; phosphate solutions: 20 mM; excitation and emission wavelengths: 420 and 505 nm, respectively.

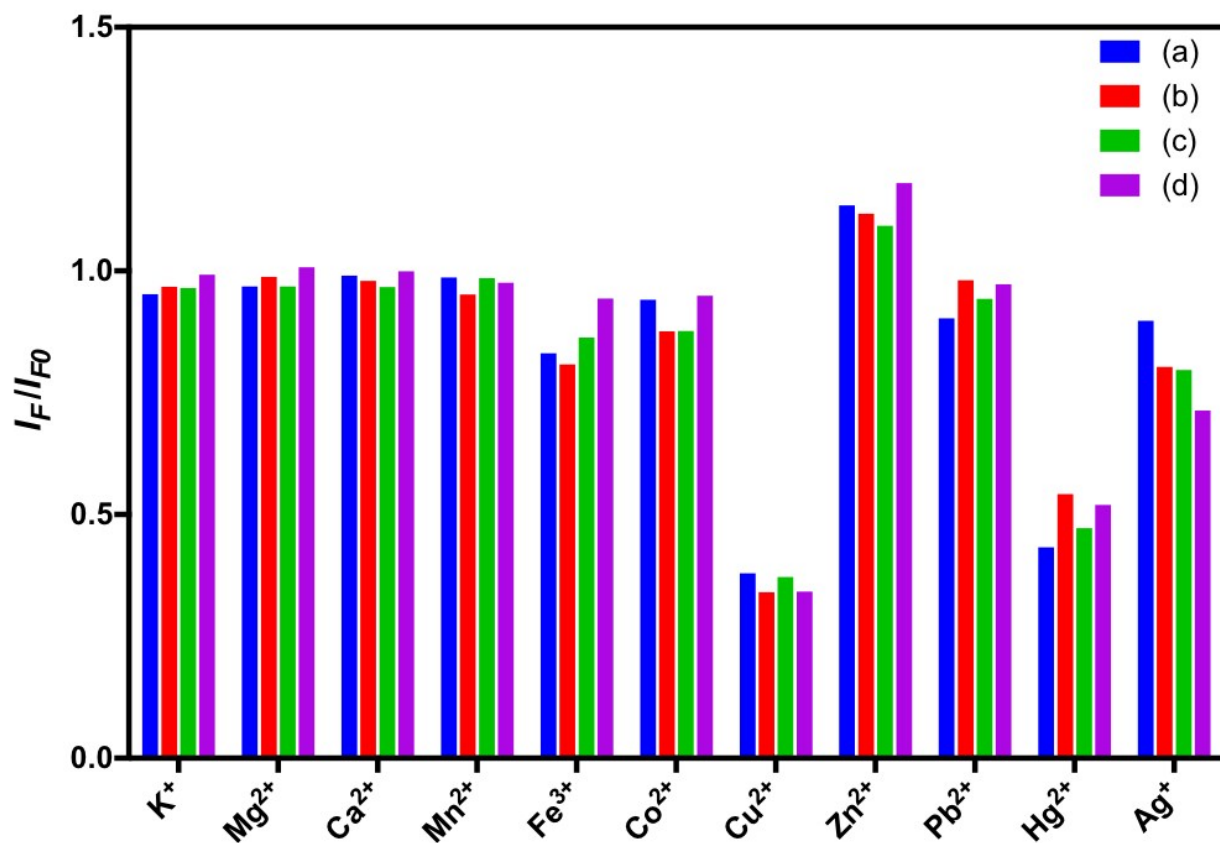

**Fig. S6.** Selectivity of (a) C dots, (b) Cl-C dots, (c) Br-C dots, and (d) I-C dots toward the detection of  $Cu^{2+}$  ions (100  $\mu M$ ) over the other metal ions (100  $\mu M$ ) in phosphate buffer (20 mM, pH 3.0). The concentrations of the four C dots used are all 0.01X. Other conditions are the same as in Fig. 2.

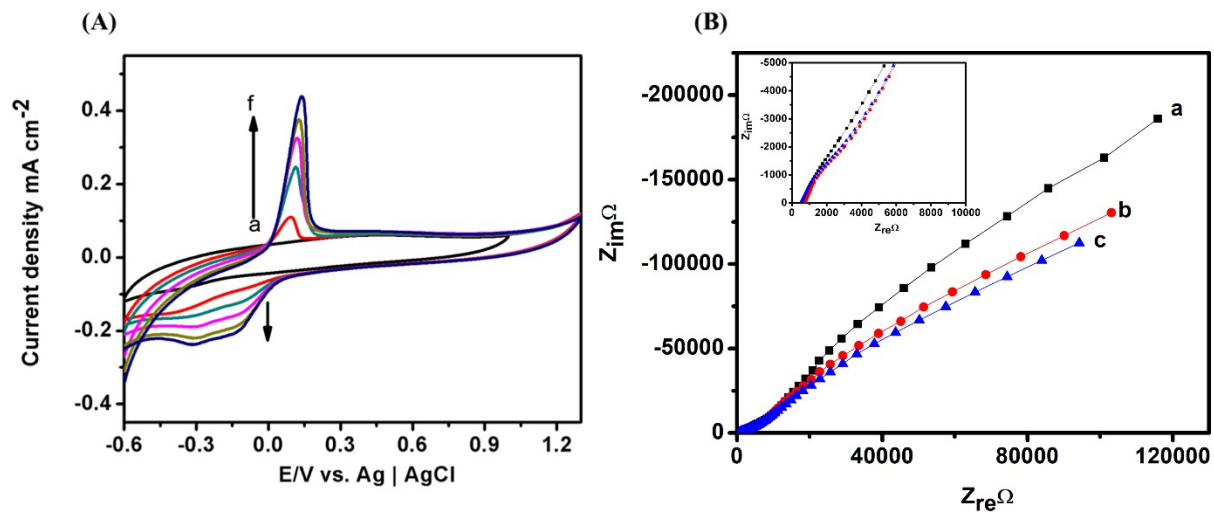

**Fig. S7.** (A) CV curves and (B) EIS spectra of bare GCE recorded in phosphate buffer (20 mM, pH 3.0) under different conditions. (A) I-C dots were dispersed in phosphate buffer (20 mM, pH 3.0) solution (a) without and (b-f) with containing Cu<sup>2+</sup> and Fe<sup>3+</sup> (200 μM). Cu<sup>2+</sup> ion concentrations (μM) used are (b) 100, (c) 200, (d) 300, (e) 400, and (f) 500. Fe<sup>3+</sup> was added as a control. Scan rate for CV curves is 50 mV s<sup>-1</sup>. (B) EIS spectra were recorded over the frequency range from 0.01 to 10000 Hz at an amplitude of 5 mV in N<sub>2</sub> saturated phosphate buffer (a) without I-C dots, (b) with I-C dots, and (c) with I-C dots and 100 μM Cu<sup>2+</sup> ions. Inset in (B): Magnified view of high frequency region of EIS spectra.

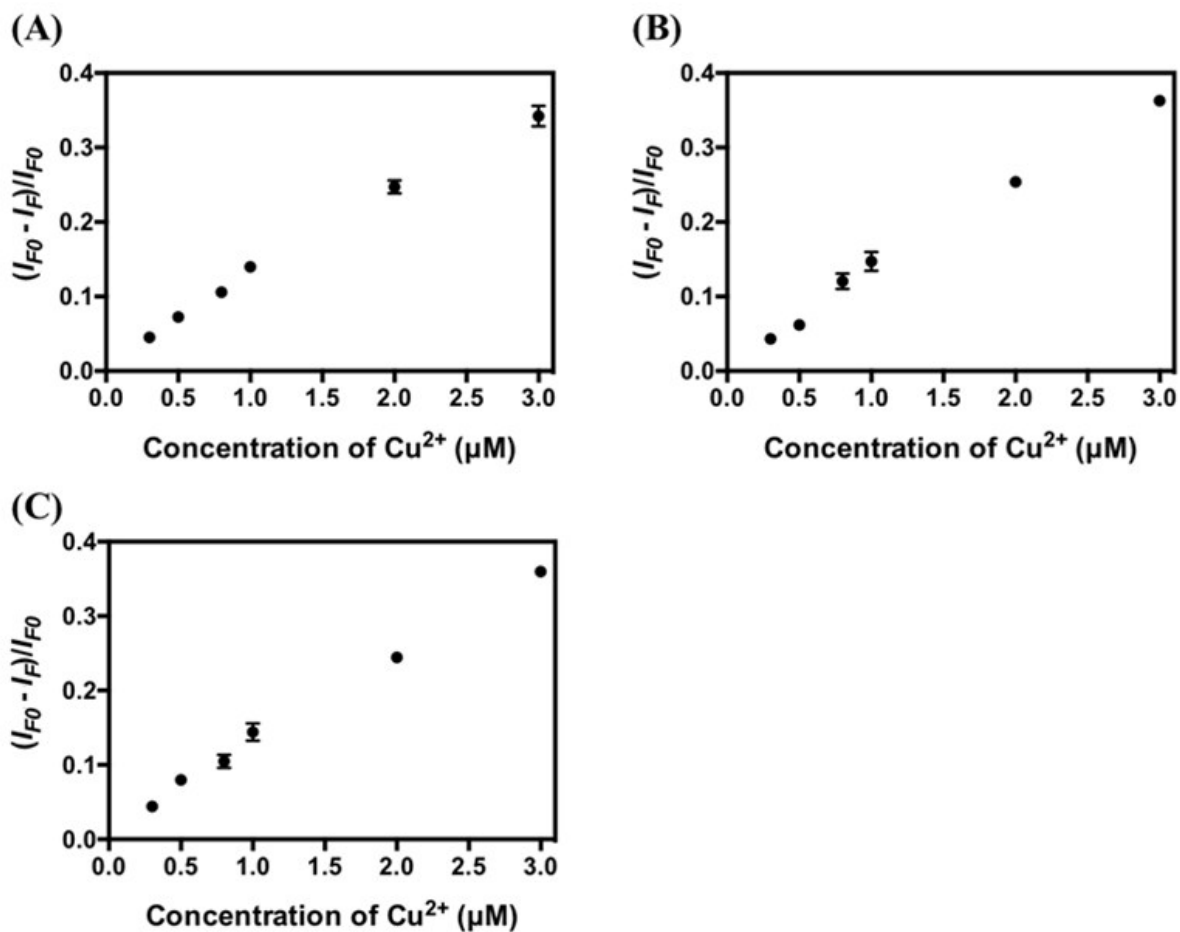

**Fig. S8.** Linearity of relative PL intensity at 505 nm of I-C dots (0.001X) toward the quantitation of  $\text{Cu}^{2+}$  ions in (A) tap water, (B) lake water, and (C) seawater. Samples were mixed with phosphate buffer (20 mM, pH 3.0), and standard  $\text{Cu}^{2+}$  solutions. Other conditions are the same as in Fig. 2.

## References

- (1) A. Zhu, Q. Qu, X. Shao, B. Kong, Y. Tian, *Angew. Chem.* 2012, **124**, 7297–7301.
- (2) M. Koneswaran, R. Narayanaswamy, *Sens. Act. B.* 2009, **139**, 104–109.
- (3) G. He, C. Liu, X. Liu, Q. Wang, A. Fan, S. Wang, X. Qian, *PloS one.* 2017, **12**. e0186994.
- (4) M. C. Rong, K. X. Zhang, Y. R. Wang, X. Chen, *Chin. Chem. Lett.* 2017. **28**, 1119–1124.
- (5) C. Boonme, T. Noipa, T. Tuntulani, W. Ngeontae, *Spectrochim. Acta Mol. Biomol. Spectrosc.* 2013, **169**, 161–168.
- (6) X. F. Hou, F. Zeng, F. K. Du and S. Z. Wu, *Nanotechnology*, 2013, **24**, 335502.
- (7) Y. Wang, W.-T. Wu, M.-B. Wu, H.-D. Sun, H. Xie, C. Hu, X.-Y. Wu and J.-H. Qiu, *New Carbon Mater.*, 2015, **30**, 550–559.
- (8) L. Zhao, H. Li, Y. Xu, H. Liu, T. Zhou, N. Huang, Y. Li and L. Ding, *Anal. Bioanal. Chem.*, 2018, **410**, 4301–4309.
